# Supplementary material for: Functional effects of chimeric antigen receptor co-receptor signaling domains in human Tregs
Source: bioRxiv or medRxiv preprint supplement (doi:10.1101/749721), 2019-08-29
Supplement: Supplementary file [file media-1.pdf]

## SUPPLEMENTAL FIGURES &amp; TABLES

Supplemental Figure 1

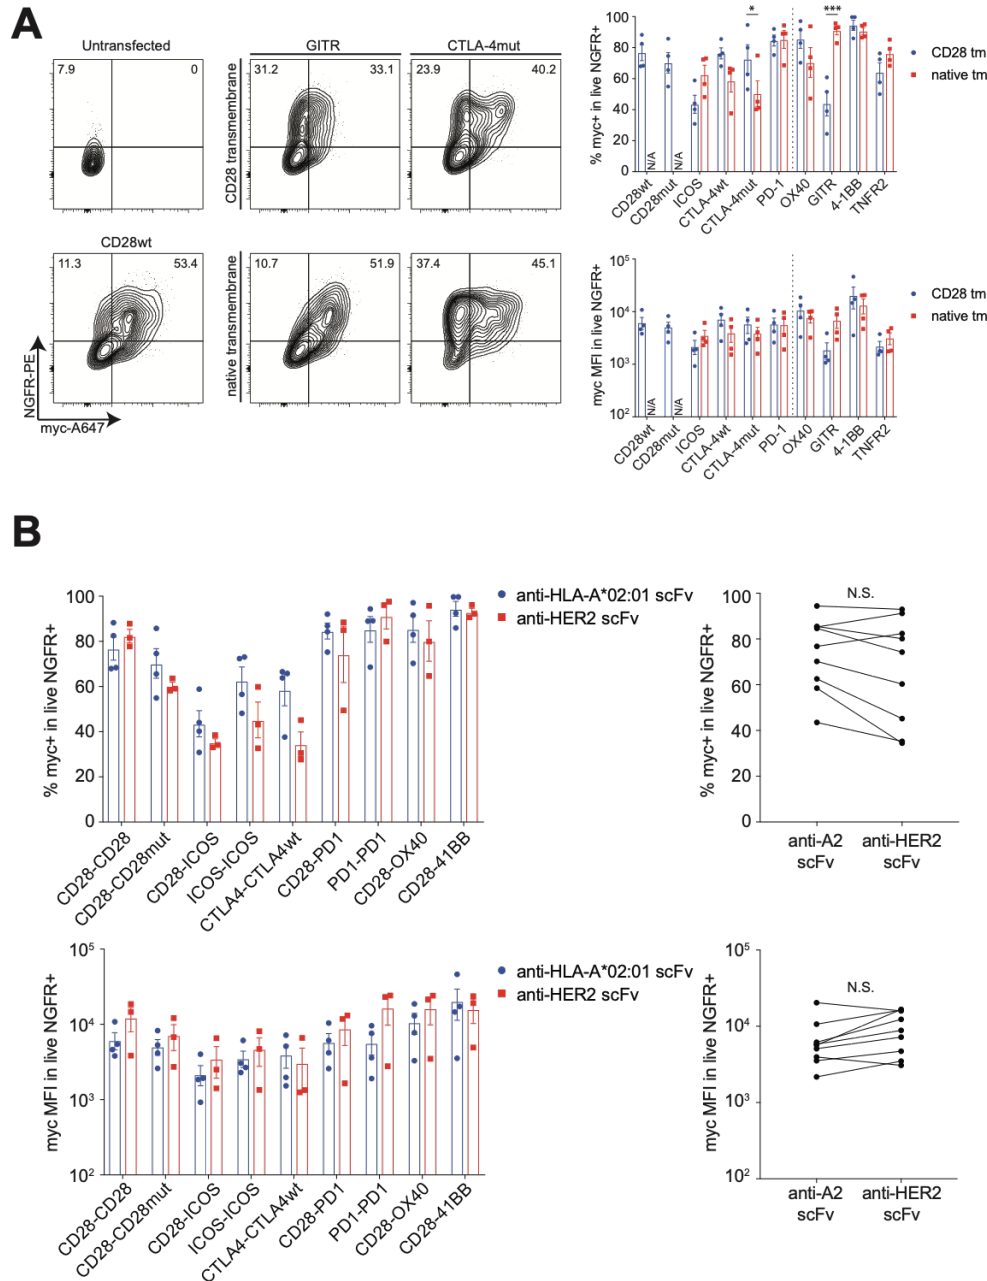

**Supplemental Figure 1. Surface expression of signaling domain CAR variants with different transmembrane domains or scFvs. (A)** Anti-HLA-A2 CAR variants were generated differing in their co-stimulatory domains, with either their original (or “native”) transmembrane domains or a CD28 transmembrane domain. These constructs were transiently transfected into 293T cells and assessed by flow cytometry 48 hours after transfection, for surface expression of the CAR, evidenced by myc-tag, and the transduction marker, truncated NGFR (CD271). Left: representative flow cytometry plots. Right: summarized data of percent of mean fluorescence intensity of myc-tag detection in the live NGFR<sup>+</sup> fraction. Data are n=3-4, pooled from at least three independent experiments. **(B)** scFvs from selected anti-HLA-A2 CAR constructs from (A) were replaced with an anti-HER2 scFv, and resultant constructs were transiently transfected into 293T cells and assessed by flow cytometry 48 hours after transfection for surface expression of the CAR, evidenced by myc-tag, and the transduction marker, truncated NGFR (CD271). Top: percent myc positive cells in live NGFR<sup>+</sup> cells. Bottom: mean fluorescence intensity of myc in live NGFR<sup>+</sup> cells. Individual data (left) and summarized data (right) are shown. Statistics show one-way ANOVA with Holm-Sidak post-test comparing each transmembrane variant or scFv pair. Mean  $\pm$  SEM. \*  $p < 0.05$ , \*\*\*  $p < 0.001$ . “n.s.” denotes not significant.

Supplemental Figure 2

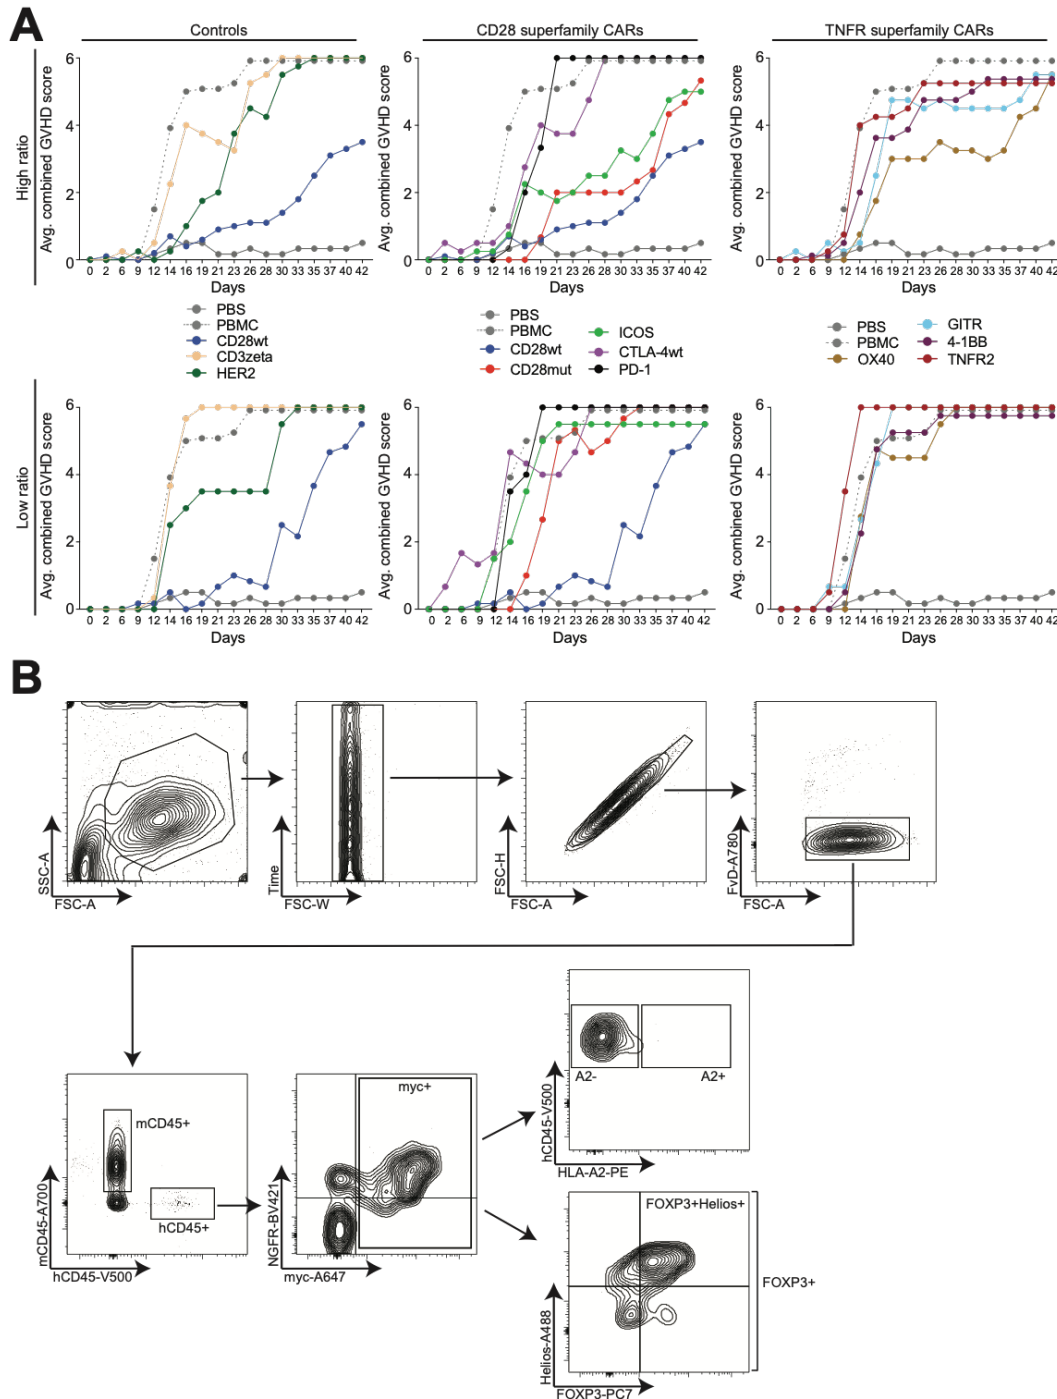

**Supplemental Figure 2. Supporting information for GVHD model. (A)** GVHD score for mice in GVHD model. Mice were scored on a scale from 0-3 for the following factors: weight loss, skin inflammation, fur maintenance, pain, deteriorating posture. If a score of 3 in any category or a combined score of 6 occurred, the mouse was sacrificed. Plotted are the average rolling combined GVHD scores for each experimental group, split by CAR signaling-domain superfamily and Treg:PBMC ratio. If a mouse was sacrificed for a score of 3 in one category, a value of 6 was assigned. Numbers of replicates are as in Figure 2, pooled from three independent experiments. Means without error are shown. **(B)** Gating strategy for flow cytometry analysis of GVHD experiments. Gates are as marked. Gating of CD28wt CAR Tregs from a high ratio mouse at day 7 is shown as an example.

Supplemental Figure 3

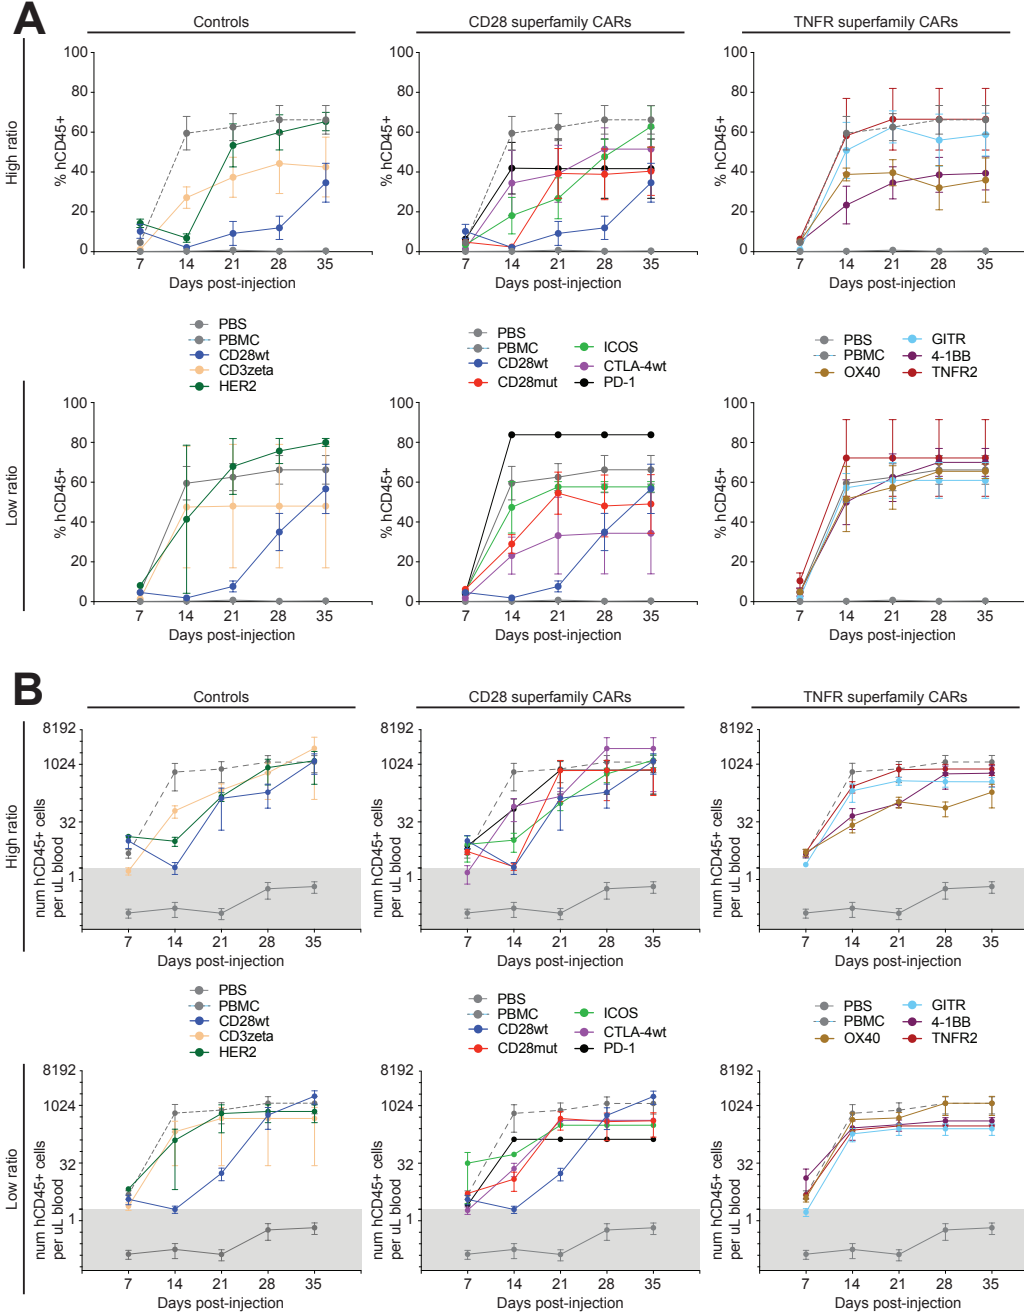

**Supplemental Figure 3. hCD45 engraftment in GVHD model.** Mice were bled weekly and at experimental endpoint. Flow cytometry analysis of blood was performed to determine the blood composition. **(A)** Percent of hCD45<sup>+</sup> cell engraftment is shown over time, split by Treg:PBMC ratio and CAR signaling domain superfamily. **(B)** Absolute number of hCD45<sup>+</sup> cells per uL of blood is shown over time. Mean ± SEM.

Supplemental Figure 4

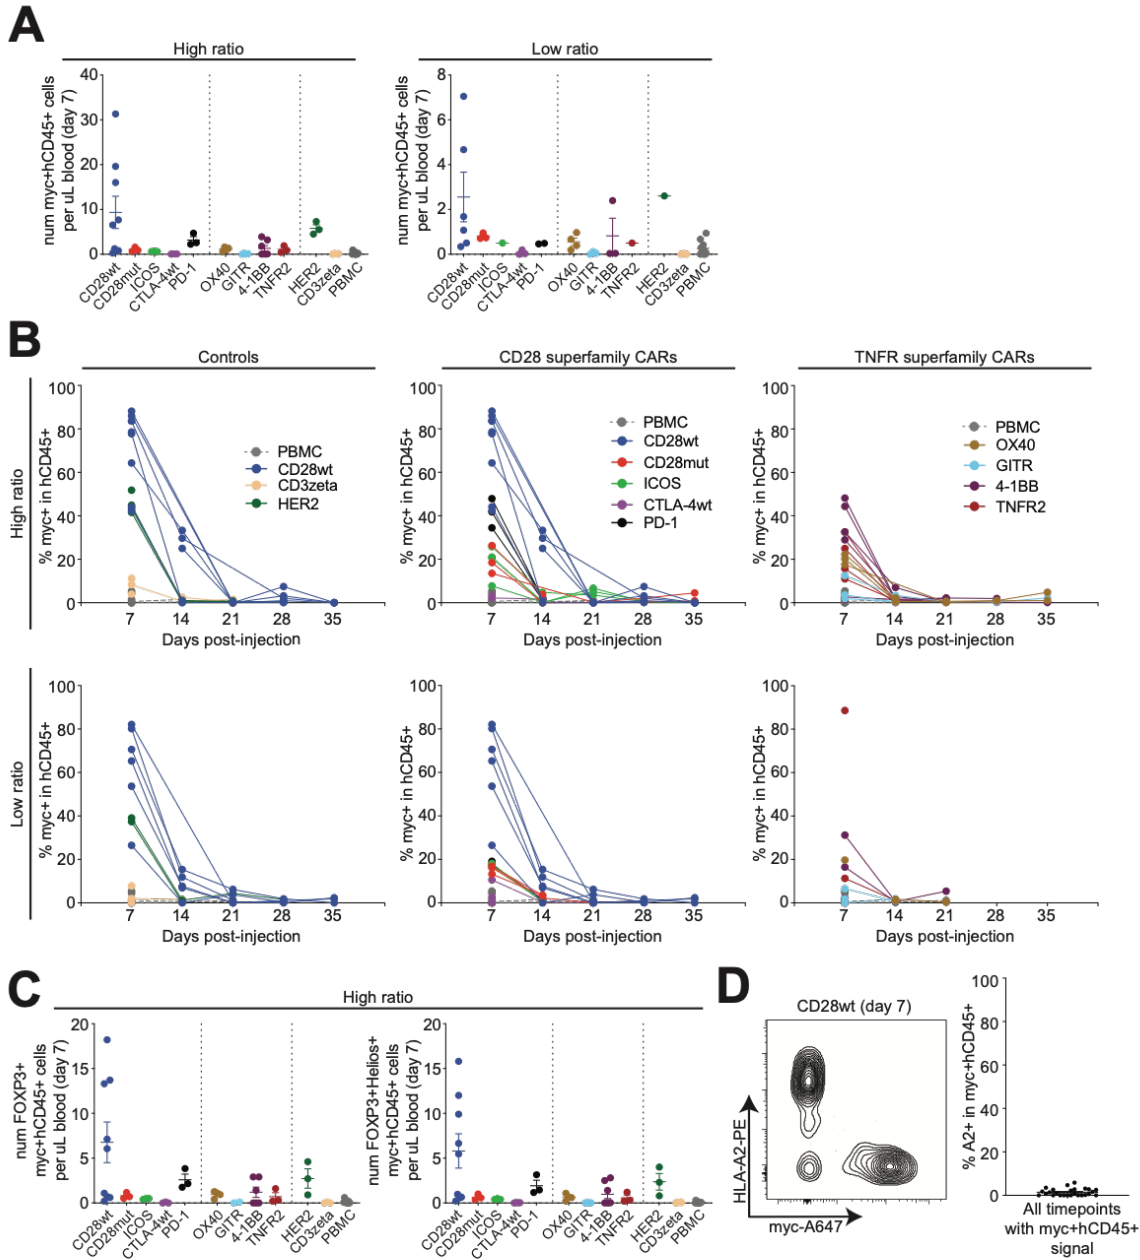

**Supplemental Figure 4. Absolute number of Myc<sup>+</sup>hCD45<sup>+</sup> cells in GVHD model.** Mice were bled on day 7 as per Figure 2A. **(A)** Proportion of myc<sup>+</sup> cells in hCD45<sup>+</sup> subset is shown over time, split by Treg:PBMC ratio and CAR signaling domain superfamily. **(B)** Absolute number of myc<sup>+</sup>hCD45<sup>+</sup> cells per uL of blood was determined on day 7 post-cell injection. Left: high Treg:PBMC ratio mice are shown. Right: low Treg:PBMC ratio mice are shown. **(C)** Absolute number of FOXP3<sup>+</sup> myc<sup>+</sup>hCD45<sup>+</sup> (left) FOXP3<sup>+</sup>Helios<sup>+</sup>myc<sup>+</sup>hCD45<sup>+</sup> (right) cells per uL of blood was determined on day 7 post-cell injection. High Treg:PBMC ratio is shown. **(D)** Comparison of HLA-A2- and myc-expressing cells. Left: example flow plot of mutually-exclusive HLA-A2 and myc staining. Right: Summary data are shown. Each dot is the average A2<sup>+</sup> expression of the myc<sup>+</sup>hCD45<sup>+</sup> population at a single timepoint. Mean ± SEM.

Supplemental Figure 5

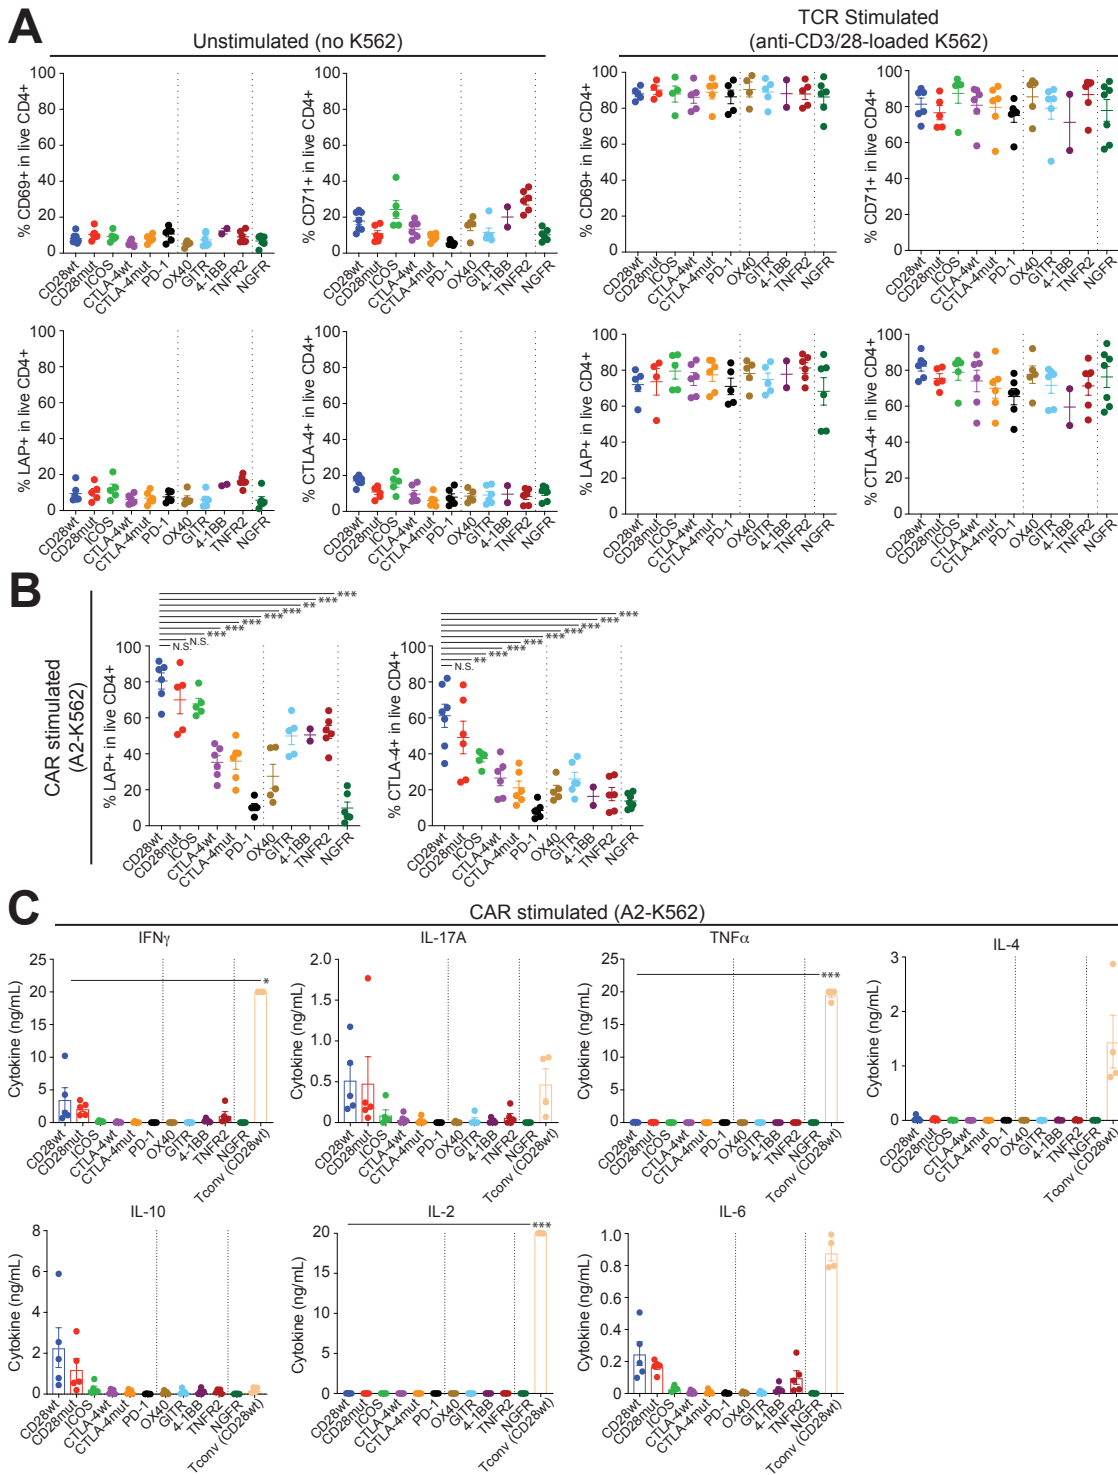

**Supplemental Figure 5. Activation and cytokine production by signaling domain CAR variants on human Tregs.** (A-C) Human Tregs were transduced and expanded as in Figure 1B, rested overnight in low IL-2 conditions, then co-cultured with either no K562 cells (unstimulated), irradiated K562 cells expressing HLA-A2 (CAR-stimulated) or irradiated anti-CD3/CD28-loaded K562 cells expressing CD64 (TCR-stimulated) at a ratio of 1 K562 to 2 CAR Tregs. (A-B) After 24 hours, percent CD69, CD71, LAP and CTLA-4 positive in live CD4 cells was determined. Summary data for (A) unstimulated and TCR-stimulated cells or (B) CAR-stimulated cells are shown. Data are n=2-7 donors, pooled from at least two independent experiments. (C) After 72 hours, amounts of the indicated cytokines were determined by cytometric bead array in CAR-stimulated cells. Results for all examined cytokines are expressed as a concentration in the supernatant. n=4-5 from at least two independent experiments. Statistics show one-way ANOVA with Holm-Sidak post-test comparing all constructs to CD28wt Tregs. Mean  $\pm$  SEM. \*  $p < 0.05$ , \*\*  $p < 0.01$ , \*\*\*  $p < 0.001$ . "n.s." denotes not significant.

Supplemental Figure 6

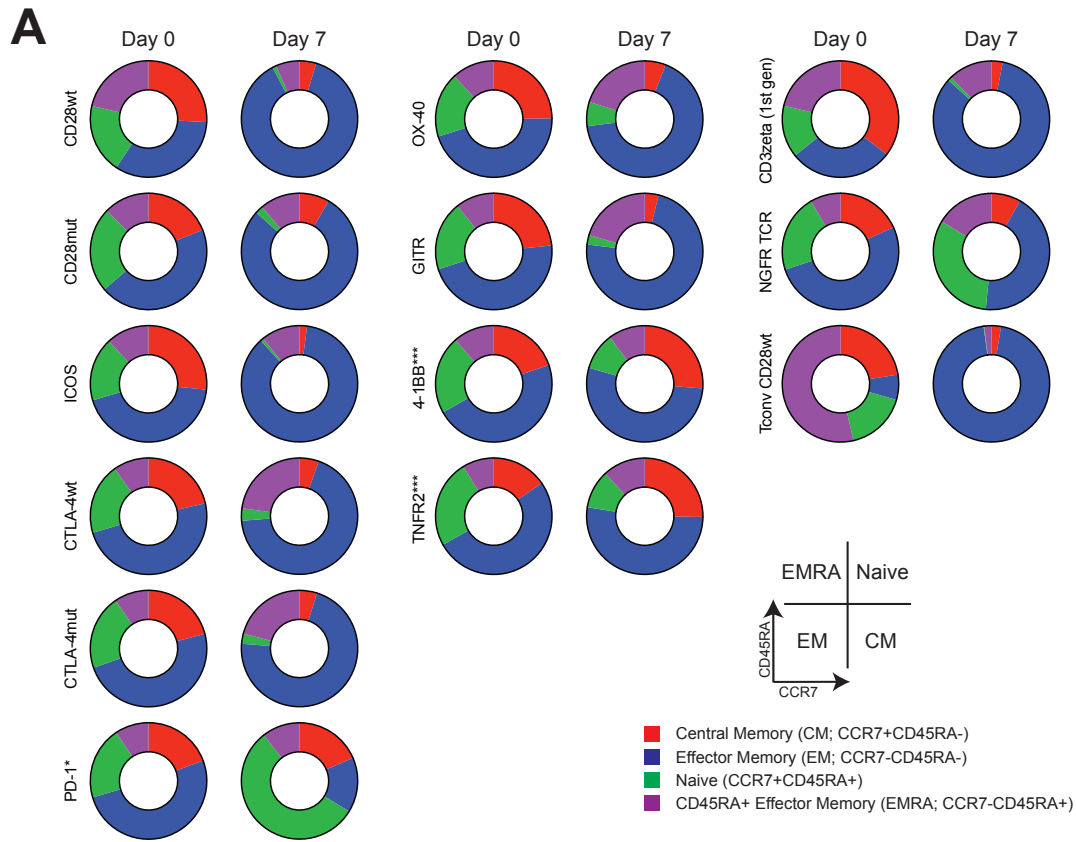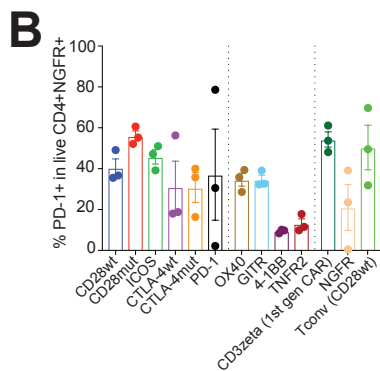

**Supplemental Figure 6. Memory subset and exhaustion of signaling variant CAR Tregs after 7-day CAR-mediated expansion.** Signaling-variant CAR Tregs derived from naïve Tregs were produced as in Figure 5, then co-cultured for 7 days with irradiated K562 cells expressing HLA-A2 at a ratio of 1 K562 cell to 2 CAR Tregs. **(A)** Using flow cytometry analysis of CD45RA and CCR7 expression in live CD4<sup>+</sup>NGFR<sup>+</sup> cells, memory subset polarization after CAR stimulation was determined. Average subset values are shown for baseline (day 0) and day 7. Statistics show a one-way ANOVA with Holm-Sidak post-test comparing proportion of central memory cells (CD45RA<sup>-</sup>CCR7<sup>+</sup>) from CD28wt to all other groups. **(B)** PD-1 expression of CD4<sup>+</sup>NGFR<sup>+</sup> cells. Data are from n=3-4 donors, pooled from at least 2 independent experiments. \*\*\* p < 0.001.

Supplemental Figure 7

**A**

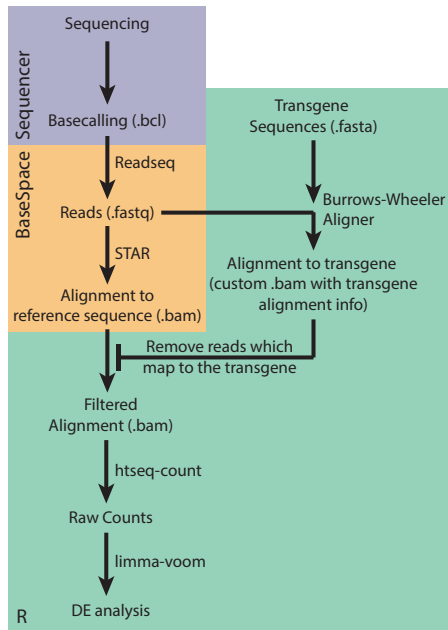

**B**

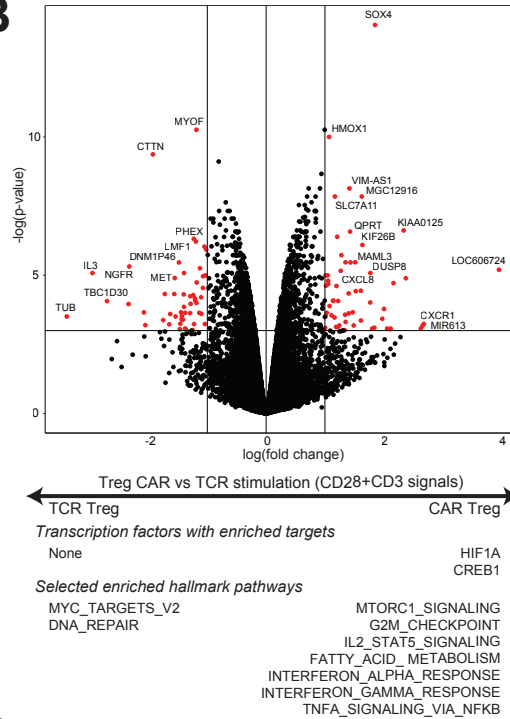

**C**

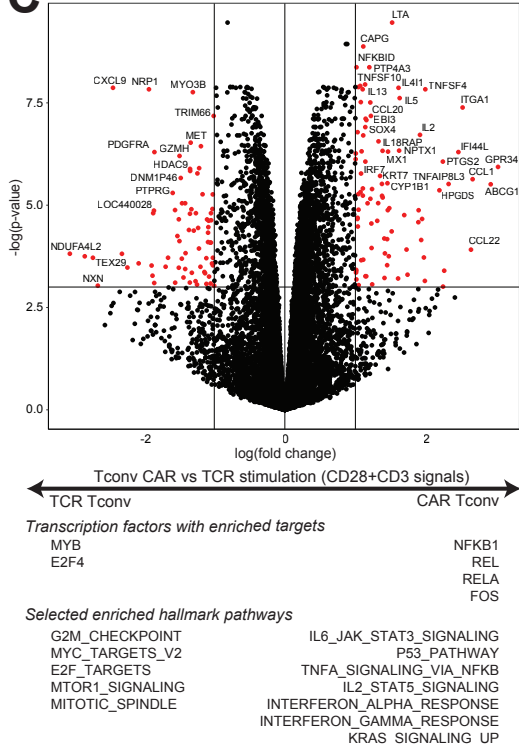

**D**

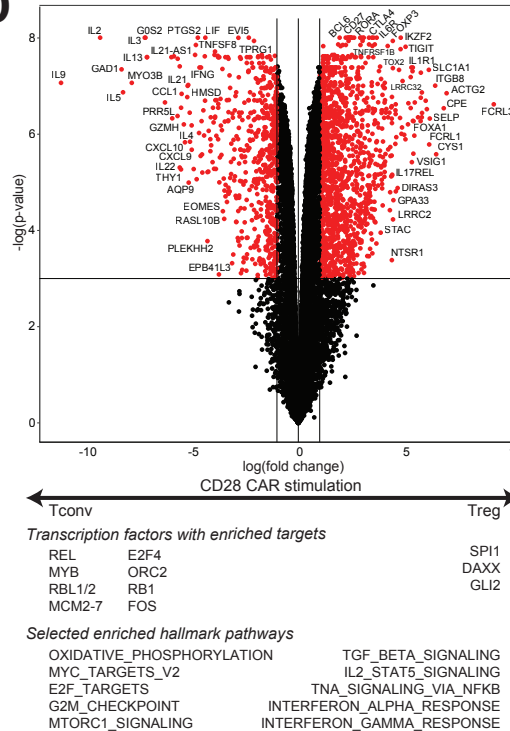

**Supplemental Figure 7. Transcriptome analysis of CAR- and TCR-stimulated Tregs and Tconv.** Purified  $\Delta$ NGFR/CAR Tregs or Tconv were stimulated with anti-CD3/CD28-dynabeads or HLA-A2-coated beads for 16 hours, then processed for RNA sequencing. **(A)** Schematic of RNA-sequencing pre-processing strategy to remove transgene reads. Complete description of actions performed is written in Methods. To observe direct functional consequences of CAR-stimulation, any sequencing reads that mapped to the CAR transgene or  $\Delta$ NGFR transduction marker were removed from further differential gene expression analysis. **(B)** Differentially expressed genes between CD28wt-CAR- and TCR-stimulated Tregs. **(C)** Differentially expressed genes between CD28wt-CAR- and TCR-stimulated Tconv. **(D)** Differentially expressed genes between CAR-stimulated Tregs and Tconv expressing a CD28wt-CAR. Full lists, normalized enrichment scores and adjusted p values are found in **Supplemental Table 5-7**.

Supplemental Table 1. Gene set enrichment analysis of transcription factor targets and hallmark pathways supporting Figure 7A

| Group: PD-1, TNFR2, CTLA-4mut, CTLA-4wt, CD3zeta |       |             | Group: CD28wt                         |      |             |
|--------------------------------------------------|-------|-------------|---------------------------------------|------|-------------|
| Enriched transcription factor targets            | NES   | Adj. p val. | Enriched transcription factor targets | NES  | Adj. p val. |
| CREBBP                                           | -1.92 | 0.0333      | MYB                                   | 2.00 | 0.0192      |
| EP300                                            | -1.92 | 0.0333      | ORC2                                  | 1.99 | 0.0213      |
|                                                  |       |             | RB1                                   | 1.94 | 0.0329      |
|                                                  |       |             | E2F4                                  | 1.90 | 0.0192      |
|                                                  |       |             | MCM2                                  | 1.87 | 0.0402      |
|                                                  |       |             | MCM3                                  | 1.87 | 0.0402      |
|                                                  |       |             | MCM4                                  | 1.87 | 0.0402      |
|                                                  |       |             | MCM5                                  | 1.87 | 0.0402      |
|                                                  |       |             | MCM6                                  | 1.87 | 0.0402      |
|                                                  |       |             | MCM7                                  | 1.87 | 0.0402      |
|                                                  |       |             | RELA                                  | 1.62 | 0.0402      |
|                                                  |       |             | NFKB1                                 | 1.45 | 0.0449      |
| Enriched hallmark pathways                       | NES   | Adj. p val. | Enriched hallmark pathways            | NES  | Adj. p val. |
| HALLMARK_INTERFERON_ALPHA_RESPONSE               | -2.01 | 0.001       | HALLMARK_MYC_TARGETS_V1               | 3.43 | 0.001       |
| HALLMARK_INTERFERON_GAMMA_RESPONSE               | -1.73 | 0.001       | HALLMARK_MYC_TARGETS_V2               | 3.08 | 0.001       |
| HALLMARK_HEME_METABOLISM                         | -1.60 | 0.004       | HALLMARK_E2F_TARGETS                  | 2.97 | 0.001       |
|                                                  |       |             | HALLMARK_MTORC1_SIGNALING             | 2.62 | 0.001       |
|                                                  |       |             | HALLMARK_UNFOLDED_PROTEIN_RESPONSE    | 2.58 | 0.001       |
|                                                  |       |             | HALLMARK_G2M_CHECKPOINT               | 2.50 | 0.001       |
|                                                  |       |             | HALLMARK_OXIDATIVE_PHOSPHORYLATION    | 2.07 | 0.001       |
|                                                  |       |             | HALLMARK_GLYCOLYSIS                   | 2.05 | 0.001       |
|                                                  |       |             | HALLMARK_DNA_REPAIR                   | 2.04 | 0.001       |
|                                                  |       |             | HALLMARK_UV_RESPONSE_UP               | 1.86 | 0.001       |
|                                                  |       |             | HALLMARK_ADIPOGENESIS                 | 1.83 | 0.001       |
|                                                  |       |             | HALLMARK_FATTY_ACID_METABOLISM        | 1.48 | 0.022       |



**Supplemental Table 2. Gene set enrichment analysis of transcription factor targets and hallmark pathways supporting Figure 7B**

| <b>Group: 4-1BB, TNFR2</b>                   |            |                    | <b>Group: CD28wt</b>                         |            |                    |
|----------------------------------------------|------------|--------------------|----------------------------------------------|------------|--------------------|
| <b>Enriched transcription factor targets</b> | <b>NES</b> | <b>Adj. p val.</b> | <b>Enriched transcription factor targets</b> | <b>NES</b> | <b>Adj. p val.</b> |
| IKBKG                                        | -1.93      | 0.0194             | ORC2                                         | 1.98       | 0.0190             |
| CREBBP                                       | -1.90      | 0.0190             | MCM2                                         | 1.83       | 0.0473             |
| EP300                                        | -1.90      | 0.0190             | MCM3                                         | 1.83       | 0.0473             |
|                                              |            |                    | MCM4                                         | 1.83       | 0.0473             |
|                                              |            |                    | MCM5                                         | 1.83       | 0.0473             |
|                                              |            |                    | MCM6                                         | 1.83       | 0.0473             |
|                                              |            |                    | MCM7                                         | 1.83       | 0.0473             |
|                                              |            |                    | E2F4                                         | 1.71       | 0.0190             |
|                                              |            |                    | MYB                                          | 1.63       | 0.0194             |

  

| <b>Enriched hallmark pathways</b>  | <b>NES</b> | <b>Adj. p val.</b> | <b>Enriched hallmark pathways</b>  | <b>NES</b> | <b>Adj. p val.</b> |
|------------------------------------|------------|--------------------|------------------------------------|------------|--------------------|
| HALLMARK_MYC_TARGETS_V2            | -2.76      | 0.003              | HALLMARK_INTERFERON_ALPHA_RESPONSE | 2.20       | 0.003              |
| HALLMARK_MYC_TARGETS_V1            | -2.74      | 0.003              | HALLMARK_INTERFERON_GAMMA_RESPONSE | 2.08       | 0.003              |
| HALLMARK_E2F_TARGETS               | -2.60      | 0.003              | HALLMARK_TNFA_SIGNALING_VIA_NFKB   | 1.52       | 0.007              |
| HALLMARK_G2M_CHECKPOINT            | -2.21      | 0.003              | HALLMARK_HEME_METABOLISM           | 1.41       | 0.037              |
| HALLMARK_MTORC1_SIGNALING          | -2.08      | 0.003              |                                    |            |                    |
| HALLMARK_UNFOLDED_PROTEIN_RESPONSE | -2.08      | 0.003              |                                    |            |                    |
| HALLMARK_UV_RESPONSE_UP            | -1.59      | 0.006              |                                    |            |                    |
| HALLMARK_GLYCOLYSIS                | -1.48      | 0.013              |                                    |            |                    |
| HALLMARK_IL2_STAT5_SIGNALING       | -1.44      | 0.013              |                                    |            |                    |

**Supplemental Table 3. Gene set enrichment analysis of transcription factor targets and hallmark pathways supporting Figure 7C**

| <b>Group: PD-1</b>                           |            |                    | <b>Group: CD3zeta</b>                        |            |                    |
|----------------------------------------------|------------|--------------------|----------------------------------------------|------------|--------------------|
| <b>Enriched transcription factor targets</b> | <b>NES</b> | <b>Adj. p val.</b> | <b>Enriched transcription factor targets</b> | <b>NES</b> | <b>Adj. p val.</b> |
| STAT6                                        | -1.96      | 0.0325             | MYB                                          | 2.06       | 0.0276             |
| STAT2                                        | -1.88      | 0.0420             | E2F4                                         | 1.46       | 0.0430             |
| STAT3                                        | -1.69      | 0.0420             |                                              |            |                    |

  

| <b>Enriched hallmark pathways</b> | <b>NES</b> | <b>Adj. p val.</b> | <b>Enriched hallmark pathways</b>  | <b>NES</b> | <b>Adj. p val.</b> |
|-----------------------------------|------------|--------------------|------------------------------------|------------|--------------------|
| HALLMARK_P53_PATHWAY              | -1.42      | 0.0140             | HALLMARK_MYC_TARGETS_V1            | 2.70       | 0.0007             |
|                                   |            |                    | HALLMARK_MYC_TARGETS_V2            | 2.50       | 0.0007             |
|                                   |            |                    | HALLMARK_MTORC1_SIGNALING          | 2.32       | 0.0007             |
|                                   |            |                    | HALLMARK_E2F_TARGETS               | 2.11       | 0.0007             |
|                                   |            |                    | HALLMARK_UNFOLDED_PROTEIN_RESPONSE | 2.09       | 0.0007             |
|                                   |            |                    | HALLMARK_CHOLESTEROL_HOMEOSTASIS   | 2.03       | 0.0007             |
|                                   |            |                    | HALLMARK_TNFA_SIGNALING_VIA_NFKB   | 1.90       | 0.0007             |
|                                   |            |                    | HALLMARK_ESTROGEN_RESPONSE_LATE    | 1.83       | 0.0007             |
|                                   |            |                    | HALLMARK_G2M_CHECKPOINT            | 1.81       | 0.0007             |
|                                   |            |                    | HALLMARK_OXIDATIVE_PHOSPHORYLATION | 1.79       | 0.0007             |
|                                   |            |                    | HALLMARK_GLYCOLYSIS                | 1.76       | 0.0007             |
|                                   |            |                    | HALLMARK_FATTY_ACID_METABOLISM     | 1.71       | 0.0007             |
|                                   |            |                    | HALLMARK_IL2_STAT5_SIGNALING       | 1.60       | 0.0019             |
|                                   |            |                    | HALLMARK_ANDROGEN_RESPONSE         | 1.56       | 0.0125             |
|                                   |            |                    | HALLMARK_UV_RESPONSE_UP            | 1.43       | 0.0181             |
|                                   |            |                    | HALLMARK_HYPOXIA                   | 1.43       | 0.0181             |
|                                   |            |                    | HALLMARK_ADIPOGENESIS              | 1.41       | 0.0170             |
|                                   |            |                    | HALLMARK_XENOBIOTIC_METABOLISM     | 1.41       | 0.0249             |
|                                   |            |                    | HALLMARK_INFLAMMATORY_RESPONSE     | 1.38       | 0.0340             |
|                                   |            |                    | HALLMARK_DNA_REPAIR                | 1.38       | 0.0340             |

Supplemental Table 4. Gene set enrichment analysis of transcription factor targets and hallmark pathways supporting Figure 7D

| Group: CD28mut                        |       |             | Group: CD28wt                         |      |             |
|---------------------------------------|-------|-------------|---------------------------------------|------|-------------|
| Enriched transcription factor targets | NES   | Adj. p val. | Enriched transcription factor targets | NES  | Adj. p val. |
| STAT1                                 | -1.91 | 0.0336      | E2F4                                  | 1.70 | 0.0269      |
| Enriched hallmark pathways            | NES   | Adj. p val. | Enriched hallmark pathways            | NES  | Adj. p val. |
| HALLMARK_WNT_BETA_CATENIN_SIGNALING   | -1.75 | 0.0124      | HALLMARK_E2F_TARGETS                  | 2.52 | 0.0013      |
| HALLMARK_INTERFERON_GAMMA_RESPONSE    | -1.67 | 0.0014      | HALLMARK_MYC_TARGETS_V1               | 2.45 | 0.0013      |
| HALLMARK_ALLOGRAFT_REJECTION          | -1.56 | 0.0064      | HALLMARK_G2M_CHECKPOINT               | 2.35 | 0.0013      |
| HALLMARK_INTERFERON_ALPHA_RESPONSE    | -1.51 | 0.0208      | HALLMARK_MTORC1_SIGNALING             | 2.28 | 0.0013      |
|                                       |       |             | HALLMARK_MYC_TARGETS_V2               | 2.02 | 0.0013      |
|                                       |       |             | HALLMARK_PROTEIN_SECRETION            | 1.96 | 0.0013      |
|                                       |       |             | HALLMARK_MITOTIC_SPINDLE              | 1.78 | 0.0013      |
|                                       |       |             | HALLMARK_UNFOLDED_PROTEIN_RESPONSE    | 1.72 | 0.0030      |
|                                       |       |             | HALLMARK_FATTY_ACID_METABOLISM        | 1.68 | 0.0032      |
|                                       |       |             | HALLMARK_XENOBIOTIC_METABOLISM        | 1.67 | 0.0032      |
|                                       |       |             | HALLMARK_SPERMATOGENESIS              | 1.56 | 0.0209      |
|                                       |       |             | HALLMARK_ANDROGEN_RESPONSE            | 1.54 | 0.0209      |
|                                       |       |             | HALLMARK_PEROXISOME                   | 1.54 | 0.0209      |
|                                       |       |             | HALLMARK_OXIDATIVE_PHOSPHORYLATION    | 1.50 | 0.0093      |
|                                       |       |             | HALLMARK_COMPLEMENT                   | 1.50 | 0.0148      |
|                                       |       |             | HALLMARK_ADIPOGENESIS                 | 1.50 | 0.0129      |
|                                       |       |             | HALLMARK_GLYCOLYSIS                   | 1.43 | 0.0239      |

Supplemental Table 5. Gene set enrichment analysis of transcription factor targets and hallmark pathways supporting Supplemental Figure 7B

| Group: Treg TCR (CD3+CD28)            |       |             | Group: Treg CAR CD28wt                   |      |             |
|---------------------------------------|-------|-------------|------------------------------------------|------|-------------|
| Enriched transcription factor targets | NES   | Adj. p val. | Enriched transcription factor targets    | NES  | Adj. p val. |
|                                       |       |             | HIF1A                                    | 1.88 | 0.0216      |
|                                       |       |             | CREB1                                    | 1.81 | 0.0216      |
| Enriched hallmark pathways            | NES   | Adj. p val. | Enriched hallmark pathways               | NES  | Adj. p val. |
| HALLMARK_MYC_TARGETS_V2               | -2.41 | 0.0019      | HALLMARK_CHOLESTEROL_HOMEOSTASIS         | 1.84 | 0.0024      |
| HALLMARK_MYC_TARGETS_V1               | -2.32 | 0.0019      | HALLMARK_MITOTIC_SPINDLE                 | 1.79 | 0.0019      |
| HALLMARK_DNA_REPAIR                   | -1.44 | 0.0167      | HALLMARK_HYPOXIA                         | 1.77 | 0.0019      |
|                                       |       |             | HALLMARK_INTERFERON_GAMMA_RESPONSE       | 1.74 | 0.0019      |
|                                       |       |             | HALLMARK_IL2_STAT5_SIGNALING             | 1.74 | 0.0019      |
|                                       |       |             | HALLMARK_TNFA_SIGNALING_VIA_NFKB         | 1.72 | 0.0019      |
|                                       |       |             | HALLMARK_SPERMATOGENESIS                 | 1.67 | 0.0043      |
|                                       |       |             | HALLMARK_HEME_METABOLISM                 | 1.65 | 0.0019      |
|                                       |       |             | HALLMARK_INFLAMMATORY_RESPONSE           | 1.64 | 0.0024      |
|                                       |       |             | HALLMARK_INTERFERON_ALPHA_RESPONSE       | 1.62 | 0.0055      |
|                                       |       |             | HALLMARK_REACTIVE_OXIGEN_SPECIES_PATHWAY | 1.60 | 0.0197      |
|                                       |       |             | HALLMARK_MTORC1_SIGNALING                | 1.60 | 0.0024      |
|                                       |       |             | HALLMARK_KRAS_SIGNALING_UP               | 1.60 | 0.0024      |
|                                       |       |             | HALLMARK_P53_PATHWAY                     | 1.56 | 0.0024      |
|                                       |       |             | HALLMARK_APOPTOSIS                       | 1.54 | 0.0044      |
|                                       |       |             | HALLMARK_PROTEIN_SECRETION               | 1.50 | 0.0182      |
|                                       |       |             | HALLMARK_ANDROGEN_RESPONSE               | 1.50 | 0.0182      |
|                                       |       |             | HALLMARK_G2M_CHECKPOINT                  | 1.44 | 0.0043      |
|                                       |       |             | HALLMARK_FATTY_ACID_METABOLISM           | 1.42 | 0.0192      |
|                                       |       |             | HALLMARK_ALLOGRAFT_REJECTION             | 1.39 | 0.0182      |
|                                       |       |             | HALLMARK_COMPLEMENT                      | 1.38 | 0.0245      |
|                                       |       |             | HALLMARK_XENOBIOTIC_METABOLISM           | 1.38 | 0.0254      |

Supplemental Table 6. Gene set enrichment analysis of transcription factor targets and hallmark pathways supporting Supplemental Figure 7C

| Group: Tconv TCR (CD3+CD28)           |       |             | Group: Tconv CAR CD28wt               |      |             |
|---------------------------------------|-------|-------------|---------------------------------------|------|-------------|
| Enriched transcription factor targets | NES   | Adj. p val. | Enriched transcription factor targets | NES  | Adj. p val. |
| MYB                                   | -1.69 | 0.0124      | REL                                   | 1.97 | 0.0175      |
| E2F4                                  | -1.59 | 0.0175      | NFKB1                                 | 1.86 | 0.0124      |
|                                       |       |             | RELA                                  | 1.84 | 0.0124      |
|                                       |       |             | FOS                                   | 1.75 | 0.0234      |

  

| Enriched hallmark pathways         | NES   | Adj. p val. | Enriched hallmark pathways                 | NES  | Adj. p val. |
|------------------------------------|-------|-------------|--------------------------------------------|------|-------------|
| HALLMARK_G2M_CHECKPOINT            | -2.57 | 0.0010      | HALLMARK_TNFA_SIGNALING_VIA_NFKB           | 2.04 | 0.0010      |
| HALLMARK_MYC_TARGETS_V1            | -2.42 | 0.0010      | HALLMARK_INTERFERON_ALPHA_RESPONSE         | 2.03 | 0.0010      |
| HALLMARK_E2F_TARGETS               | -2.17 | 0.0010      | HALLMARK_INFLAMMATORY_RESPONSE             | 1.90 | 0.0010      |
| HALLMARK_MYC_TARGETS_V2            | -1.96 | 0.0010      | HALLMARK_P53_PATHWAY                       | 1.84 | 0.0010      |
| HALLMARK_MITOTIC_SPINDLE           | -1.83 | 0.0010      | HALLMARK_IL2_STAT5_SIGNALING               | 1.80 | 0.0010      |
| HALLMARK_UV_RESPONSE_DN            | -1.72 | 0.0010      | HALLMARK_INTERFERON_GAMMA_RESPONSE         | 1.77 | 0.0010      |
| HALLMARK_UNFOLDED_PROTEIN_RESPONSE | -1.36 | 0.0487      | HALLMARK_XENOBIOTIC_METABOLISM             | 1.62 | 0.0026      |
| HALLMARK_MTORC1_SIGNALING          | -1.32 | 0.0429      | HALLMARK_REACTIVE_OXIGEN_SPECIES_PATHWAY   | 1.50 | 0.0451      |
|                                    |       |             | HALLMARK_APOPTOSIS                         | 1.50 | 0.0104      |
|                                    |       |             | HALLMARK_IL6_JAK_STAT3_SIGNALING           | 1.46 | 0.0475      |
|                                    |       |             | HALLMARK_UV_RESPONSE_UP                    | 1.46 | 0.0194      |
|                                    |       |             | HALLMARK_EPITHELIAL_MESENCHYMAL_TRANSITION | 1.44 | 0.0248      |
|                                    |       |             | HALLMARK_COMPLEMENT                        | 1.41 | 0.0248      |
|                                    |       |             | HALLMARK_KRAS_SIGNALING_UP                 | 1.40 | 0.0328      |
|                                    |       |             | HALLMARK_APICAL_JUNCTION                   | 1.37 | 0.0429      |

**Supplemental Table 7. Gene set enrichment analysis of transcription factor targets and hallmark pathways supporting Supplemental Figure 7D**

| Group: Tconv CD28wt                   |       |             | Group: Treg CD28wt                    |      |             |
|---------------------------------------|-------|-------------|---------------------------------------|------|-------------|
| Enriched transcription factor targets | NES   | Adj. p val. | Enriched transcription factor targets | NES  | Adj. p val. |
| REL                                   | -2.34 | 0.0082      | SPI1                                  | 2.03 | 0.0082      |
| MYB                                   | -2.07 | 0.0082      | DAXX                                  | 1.93 | 0.0230      |
| RBL1                                  | -2.04 | 0.0230      | GLI2                                  | 1.85 | 0.0331      |
| RBL2                                  | -2.04 | 0.0230      |                                       |      |             |
| MCM2                                  | -1.93 | 0.0230      |                                       |      |             |
| MCM3                                  | -1.93 | 0.0230      |                                       |      |             |
| MCM4                                  | -1.93 | 0.0230      |                                       |      |             |
| MCM5                                  | -1.93 | 0.0230      |                                       |      |             |
| MCM6                                  | -1.93 | 0.0230      |                                       |      |             |
| MCM7                                  | -1.93 | 0.0230      |                                       |      |             |
| E2F4                                  | -1.90 | 0.0082      |                                       |      |             |
| RB1                                   | -1.83 | 0.0294      |                                       |      |             |
| ORC2                                  | -1.82 | 0.0331      |                                       |      |             |
| FOS                                   | -1.71 | 0.0309      |                                       |      |             |

  

| Enriched hallmark pathways         | NES   | Adj. p val. | Enriched hallmark pathways         | NES  | Adj. p val. |
|------------------------------------|-------|-------------|------------------------------------|------|-------------|
| HALLMARK_MYC_TARGETS_V1            | -3.71 | 0.0011      | HALLMARK_INTERFERON_ALPHA_RESPONSE | 2.06 | 0.0011      |
| HALLMARK_MYC_TARGETS_V2            | -3.38 | 0.0011      | HALLMARK_CHOLESTEROL_HOMEOSTASIS   | 1.88 | 0.0013      |
| HALLMARK_E2F_TARGETS               | -2.88 | 0.0011      | HALLMARK_HYPOXIA                   | 1.87 | 0.0013      |
| HALLMARK_UNFOLDED_PROTEIN_RESPONSE | -2.41 | 0.0011      | HALLMARK_HEME_METABOLISM           | 1.80 | 0.0013      |
| HALLMARK_DNA_REPAIR                | -2.18 | 0.0011      | HALLMARK_APOPTOSIS                 | 1.80 | 0.0011      |
| HALLMARK_G2M_CHECKPOINT            | -2.16 | 0.0011      | HALLMARK_INTERFERON_GAMMA_RESPONSE | 1.80 | 0.0013      |
| HALLMARK_OXIDATIVE_PHOSPHORYLATION | -1.95 | 0.0011      | HALLMARK_UV_RESPONSE_DN            | 1.75 | 0.0013      |
| HALLMARK_MTORC1_SIGNALING          | -1.78 | 0.0011      | HALLMARK_COMPLEMENT                | 1.75 | 0.0016      |
| HALLMARK_UV_RESPONSE_UP            | -1.50 | 0.0079      | HALLMARK_IL6_JAK_STAT3_SIGNALING   | 1.70 | 0.0063      |
|                                    |       |             | HALLMARK_TNFA_SIGNALING_VIA_NFKB   | 1.69 | 0.0013      |
|                                    |       |             | HALLMARK_P53_PATHWAY               | 1.65 | 0.0013      |
|                                    |       |             | HALLMARK_MITOTIC_SPINDLE           | 1.57 | 0.0016      |
|                                    |       |             | HALLMARK_IL2_STAT5_SIGNALING       | 1.57 | 0.0016      |
|                                    |       |             | HALLMARK_MYOGENESIS                | 1.55 | 0.0074      |

| Enriched hallmark pathways | NES | Adj. p val. | Enriched hallmark pathways                 | NES  | Adj. p val. |
|----------------------------|-----|-------------|--------------------------------------------|------|-------------|
|                            |     |             | HALLMARK_APICAL_JUNCTION                   | 1.53 | 0.0063      |
|                            |     |             | HALLMARK_EPITHELIAL_MESENCHYMAL_TRANSITION | 1.49 | 0.0114      |
|                            |     |             | HALLMARK_BILE_ACID_METABOLISM              | 1.49 | 0.0244      |
|                            |     |             | HALLMARK_TGF_BETA_SIGNALING                | 1.49 | 0.0385      |
|                            |     |             | HALLMARK_ALLOGRAFT_REJECTION               | 1.48 | 0.0087      |
|                            |     |             | HALLMARK_PROTEIN_SECRETION                 | 1.47 | 0.0241      |
|                            |     |             | HALLMARK_KRAS_SIGNALING_DN                 | 1.43 | 0.0337      |
|                            |     |             | HALLMARK_KRAS_SIGNALING_UP                 | 1.40 | 0.0275      |
